# Supplementary material for: Macrophage miR-149-5p induction is a key driver and therapeutic target for BRONJ
Source: JCI journal article supplement (doi:10.1172/jci.insight.159865), 2022-08-21
Supplement: sd1 [file 1]

**Supplemental Information****Table S1. Primer sequence for qRT-PCR, ChIP qPCR.**

| Gene                                      | Primer Sequence (5' - 3')                              |
|-------------------------------------------|--------------------------------------------------------|
| GAPDH                                     | F: AGGTCGGTGTGAACGGATTTG<br>R: TGTAGACCATGTAGTTGAGGTCA |
| U6                                        | ATGGACTATCATATGCTTACCGTA                               |
| miR-149-5p                                | CTCCGTGTCTTCACTCCCAA                                   |
| miR-16-1-3p                               | AGTATTGACTGTGCTGCTGAAAA                                |
| miR-23a-3p                                | GCCAGGGATTTCCAAA                                       |
| miR-145-3p                                | AGTTTTCCCAGGAATCCCTAAA                                 |
| miR-129-5p                                | TGCGGTCTGGGCTTGCAA                                     |
| miR-221-3p                                | TACATTGTCTGCTGGGTTTCAA                                 |
| Pri-miR149                                | F: AATGCATGGGCTTCTGGGC<br>R: CTCCTCCTCGGACAAACAC       |
| Primer for Pri-miR149 Promotor (ChIP-p65) | F: AGAGATTATACTCCGAAT<br>R: CACCTTCTGAAGATAATG         |
| AntagomiR-149-5p                          | GGGAGUGAAGACACGGAGCCAGA                                |
| AntagomiR-NC                              | CAGUACUUUUGUGUAGUACAA                                  |

**Table S2. Information of Antibodies**

| <b>Antibodies (Dilution)</b>                                          | <b>Source</b>             | <b>Cat#</b>     |
|-----------------------------------------------------------------------|---------------------------|-----------------|
| Rat monoclonal anti-Endomucin (1:100)                                 | Santa Cruz                | Cat# sc-65495   |
| Goat polyclonal Goat anti- CD31 conjugated to Alexa Fluor 488 (1:100) | R&D Systems               | Cat# FAB3628G   |
| Rat polyclonal anti-Osterix (1:500)                                   | Abcam                     | Cat# ab22552    |
| Mouse monoclonal anti-CD31 (1:2000)                                   | Proteintech               | Cat# 66065-2-Ig |
| Rabbit monoclonal anti-CD31 (1:2000)                                  | Proteintech               | Cat# 19003-1-AP |
| Mouse monoclonal anti-CD63 (1:1000)                                   | Abcam                     | Cat# ab213090   |
| Rabbit anti-HSP70 (1:1000)                                            | Cell Signaling Technology | Cat# 4872       |
| Rabbit polyclonal anti-Calnexin (1:2000)                              | Proteintech               | Cat# 10427-2-AP |
| Mouse monoclonal anti-GAPDH (1:1000)                                  | Cell Signaling Technology | Cat# 5174       |
| Rabbit monoclonal anti-p65 (1:1000)                                   | Cell Signaling Technology | Cat# 8242       |

|                                                      |                           |                 |
|------------------------------------------------------|---------------------------|-----------------|
| Mouse monoclonal anti-I $\kappa$ B $\alpha$ (1:1000) | Cell Signaling Technology | Cat# 4814       |
| Rabbit monoclonal anti-Lamin B1 (1:1000)             | Cell Signaling Technology | Cat# 13435      |
| Rabbit polyclonal anti-Rap1a (1:2000)                | Affinity                  | Cat# DF6157     |
| Rabbit polyclonal anti-Rap1b (1:2000)                | Proteintech               | Cat# 10840-1-AP |
| Rabbit polyclonal anti-VEGFR2 (1:1000)               | Proteintech               | Cat# 26415-1-AP |
| Rabbit polyclonal anti-P-VEGFR2 (1:2000)             | Affinity                  | Cat# AF4426     |
| Rabbit monoclonal anti-ERK (1:1000)                  | Cell Signaling Technology | Cat# 4695       |
| Rabbit monoclonal anti-P-ERK (1:1000)                | Cell Signaling Technology | Cat# 4370       |
| Rabbit anti-P38 (1:1000)                             | Cell Signaling Technology | Cat# 9212       |
| Rabbit anti-P-P38 (1:1000)                           | Cell Signaling Technology | Cat# 9211       |
| Mouse monoclonal anti-I $\kappa$ B $\alpha$ (1:1000) | Santa Cruz                | Cat# sc-7294    |
| Mouse monoclonal anti-CTSK (1:100)                   | Santa Cruz                | Cat# sc-48353   |

|                                      |               |                   |
|--------------------------------------|---------------|-------------------|
| Mouse monoclonal anti-TRAF6 (1:5000) | Proteintech   | Cat# 66498-1-Ig   |
| PE anti-mouse/human CD11b Antibody   | BioLegend     | Cat# 101208       |
| APC Anti-Mouse CD206 Antibody        | Elabscience   | Cat# E-AB-F1135UE |
| FITC Anti-Mouse CD86                 | MULTI SCIENCE | Cat# AM08601      |

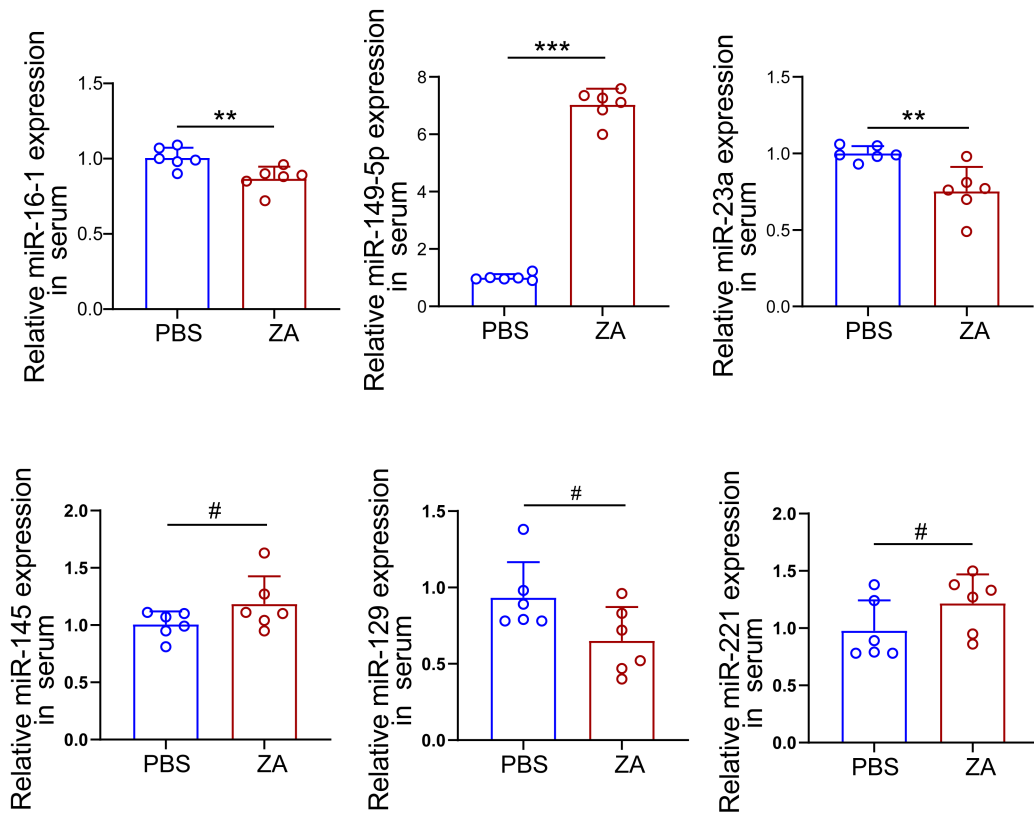

**Fig S1: MiRNAs expression profiling in mice serum.** Results are presented as the mean  $\pm$  S.D. \*\* $p < 0.01$ ; \*\*\* $p < 0.001$ ; # $p > 0.05$  by Student's t test.

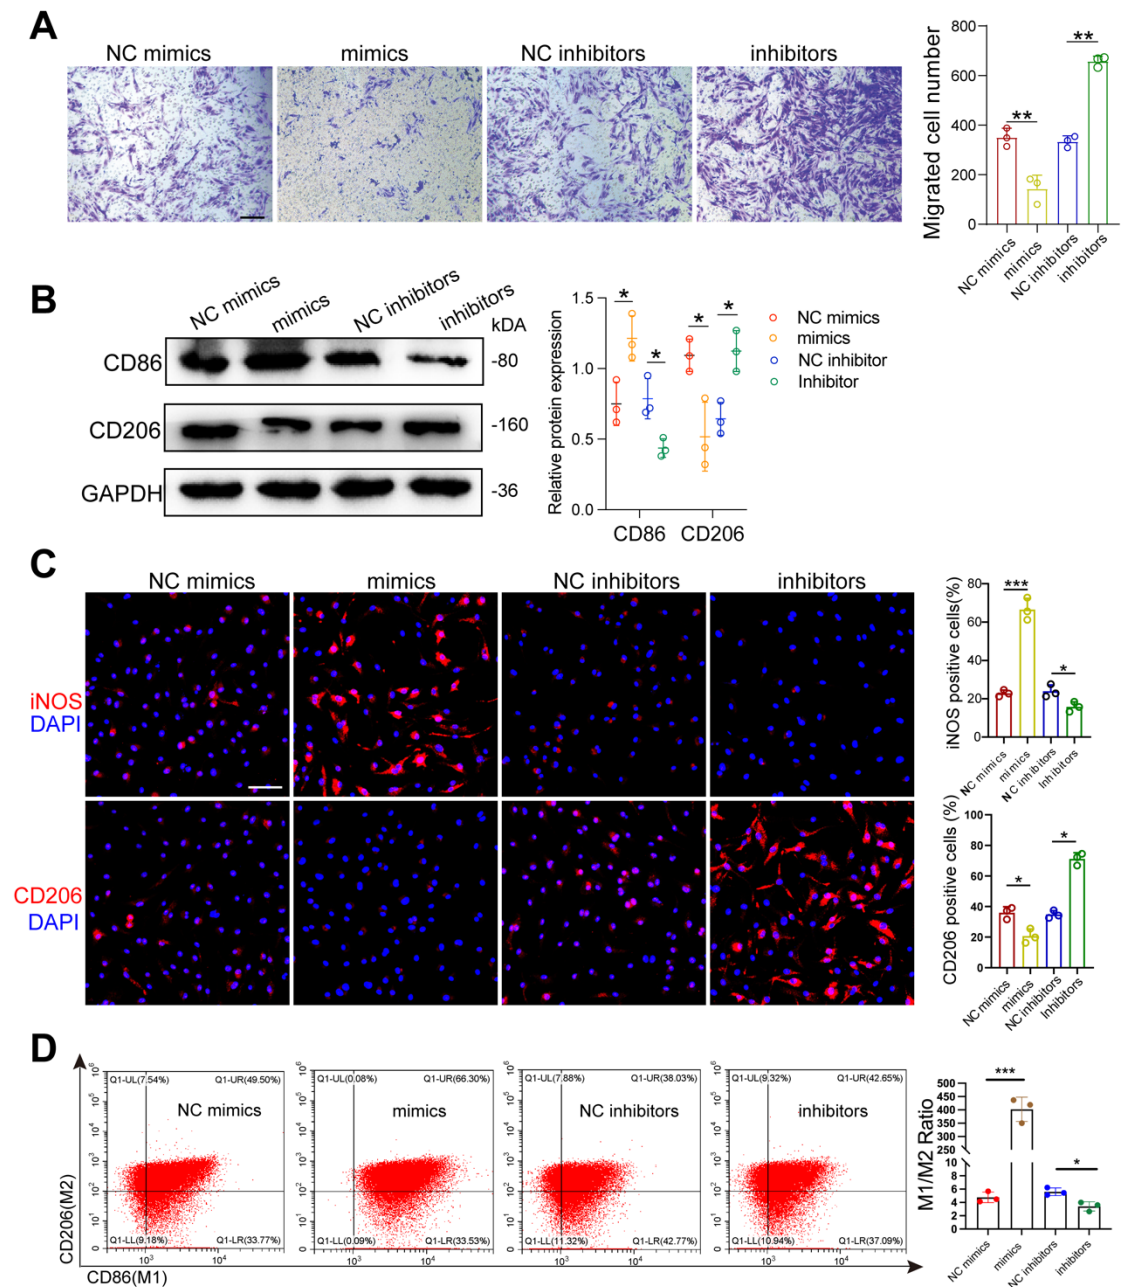

**Fig S2: Effects of miR-149-5p on ECs migration and BMMs polarization.** (A) Representative images of transwell migration assay of ECs and quantification analysis. Scale bars: 100  $\mu$ m. n=3. (B) Western blot analysis of the expression of CD86 and CD206 in BMMs. n=3. (C) Representative immunostaining images of the expression of iNOS and CD206 in BMMs and quantification analysis. Scale bars: 100  $\mu$ m. n=3. (D) Representative percentages of M1 (CD86) or M2 (CD206) macrophages were detected in by flow cytometric analysis. n=3. Results are presented as the mean  $\pm$  S.D. \* $p < 0.05$ ; \*\*\* $p < 0.001$  by Student's t test.
